# Supplementary material for: Extreme drought impacts have been underestimated in grasslands and shrublands globally
Source: PubMed Central journal article supplement — Proc Natl Acad Sci U S A. 2024 Jan 8;121(4):e2309881120. doi: 10.1073/pnas.2309881120 (PMC10823251; doi:10.1073/pnas.2309881120), 2024-01-08
Supplement: pnas.2309881120.sapp.pdf [file pnas.2309881120.sapp.pdf]

## Supporting Information for

### Extreme drought impacts have been underestimated in grasslands and shrublands globally

Melinda D. Smith<sup>a,b,1,2</sup>, Kate D. Wilkins<sup>c,1</sup>, Martin C. Holdrege<sup>d</sup>, Peter Wilfahrt<sup>e</sup>, Scott L. Collins<sup>f</sup>, Alan K. Knapp<sup>a,b</sup>, Osvaldo E Sala<sup>g</sup>, Jeffrey S. Dukes<sup>h</sup>, Richard P Phillips<sup>i</sup>, Laura Yahdjian<sup>j</sup>, Laureano A. Gherardi<sup>k</sup>, Timothy Ohlert<sup>a</sup>, Claus Beier<sup>l</sup>, Lauchlan H. Fraser<sup>m</sup>, Anke Jentsch<sup>n</sup>, Michael E. Loik<sup>o</sup>, Fernando T. Maestre<sup>p,q</sup>, Sally A. Power<sup>r</sup>, Qiang Yu<sup>s</sup>, Andrew J. Felton<sup>t</sup>, Seth M. Munson<sup>u</sup>, Yiqi Luo<sup>v</sup>, Hamed Abdoli<sup>w</sup>, Mehdi Abedi<sup>w</sup>, Concepción L. Alados<sup>x</sup>, Juan Alberti<sup>y</sup>, Moshe Alon<sup>z</sup>, Hui An<sup>aa</sup>, Brian Anacker<sup>bb</sup>, Maggie Anderson<sup>e</sup>, Harald Auge<sup>cc,dd</sup>, Seton Bachle<sup>ee,ff</sup>, Khadijeh Bahalkeh<sup>w</sup>, Michael Bahn<sup>gg</sup>, Amgaa Batbaatar<sup>hh,ii</sup>, Taryn Bauerle<sup>v</sup>, Karen H. Beard<sup>d</sup>, Kai Behn<sup>jj</sup>, Ilka Beil<sup>kk</sup>, Lucio Biancarini<sup>j</sup>, Irmgard Blindow<sup>ll</sup>, Viviana Florencia Bondaruk<sup>j</sup>, Elizabeth T. Borer<sup>c</sup>, Edward W. Bork<sup>ii</sup>, Carlos Martin Bruschetti<sup>y</sup>, Kerry M. Byrne<sup>mmm</sup>, James F. Cahill Jr.<sup>hh</sup>, Dianela A. Calvo<sup>nn</sup>, Michele Carbognani<sup>oo</sup>, Augusto Cardoni<sup>y</sup>, Cameron N. Carlyle<sup>ii</sup>, Miguel Castillo-Garcia<sup>x</sup>, Scott X. Chang<sup>pp</sup>, Jeff Chieppa<sup>r</sup>, Marcus V. Cianciaruso<sup>qq</sup>, Ofer Cohen<sup>z</sup>, Amanda L. Cordeiro<sup>rr</sup>, Daniela F. Cusack<sup>rr</sup>, Sven Dahlke<sup>ll</sup>, Pedro Daleo<sup>y</sup>, Carla M. D'Antonio<sup>ss</sup>, Lee H. Dietterich<sup>rr,tt</sup>, Tim S. Doherty<sup>uu</sup>, Maren Dubbert<sup>vv</sup>, Anne Ebeling<sup>ww</sup>, Nico Eisenhauer<sup>dd,xx</sup>, Felícia M. Fischer<sup>xx,zz</sup>, T'ai G. W. Forte<sup>oo</sup>, Tobias Gebauer<sup>aaa,3</sup>, Beatriz Gozalo<sup>q</sup>, Aaron C. Greenville<sup>uu</sup>, Karlo G. Guidoni-Martins<sup>qq</sup>, Heather J. Hannusch<sup>bbb</sup>, Siri Vatsø Haugum<sup>ccc</sup>, Yann Hautier<sup>ddd</sup>, Mariet Hefting<sup>ddd</sup>, Hugh A. L. Henry<sup>eee</sup>, Daniela Hoss<sup>dd,xx,yy</sup>, Johannes Ingrisch<sup>gg</sup>, Oscar Iribarne<sup>y</sup>, Forest Isbell<sup>e</sup>, Yari Johnson<sup>fff</sup>, Samuel Jordan<sup>g</sup>, Eugene F. Kelly<sup>ggg</sup>, Kaitlin Kimmel<sup>hhh</sup>, Juergen Kreyling<sup>kk</sup>, György Kröel-Dulay<sup>iii</sup>, Alicia Kröpfl<sup>jjj</sup>, Angelika Kübert<sup>kkk</sup>, Andrew Kulmatiski<sup>d</sup>, Eric G. Lamb<sup>lll</sup>, Klaus Steenberg Larsen<sup>l</sup>, Julie Larson<sup>mmm</sup>, Jason Lawson<sup>nnn</sup>, Cintia V. Leder<sup>mn</sup>, Anja Linstädter<sup>ooo</sup>, Jieliu Liu<sup>ppp</sup>, Shirong Liu<sup>qqq</sup>, Alexandra G. Lodge<sup>bbb</sup>, Grisel Longo<sup>rrr</sup>, Alejandro Loydi<sup>sss</sup>, Junwei Luan<sup>ttt</sup>, Frederick Curtis Lubbe<sup>uuu</sup>, Craig Macfarlane<sup>vvv</sup>, Kathleen Mackie-Haas<sup>www</sup>, Andrey V. Malyshev<sup>kk</sup>, Adrián Maturano-Ruiz<sup>q</sup>, Thomas Merchant<sup>xxx</sup>, Daniel B. Metcalfe<sup>yyy</sup>, Akira S. Mori<sup>zzz,aaaa</sup>, Edwin Mudongo<sup>bbbb</sup>, Gregory S. Newman<sup>cccc</sup>, Uffe N. Nielsen<sup>r</sup>, Dale Nimmo<sup>dddd</sup>, Yujie Niu<sup>n</sup>, Paola Nobre<sup>qq</sup>, Rory C. O'Connor<sup>mmm</sup>, Romà Ogaya<sup>eeee,ffff</sup>, Gastón R. Oñatibia<sup>j</sup>, Ildikó Orbán<sup>iii,ooo</sup>, Brooke Osborne<sup>gggg</sup>, Rafael Otfinowski<sup>hhhh</sup>, Meelis Pärtel<sup>iiii</sup>, Josep Penuelas<sup>eeee,ffff</sup>, Pablo L. Peri<sup>jjjj</sup>, Guadalupe Peter<sup>nn</sup>, Alessandro Petraglia<sup>oo</sup>, Catherine Picon-Cochard<sup>kkkk</sup>, Valério D. Pillar<sup>yy</sup>, Juan Manuel Piñeiro-Guerra<sup>j,llll</sup>, Laura W. Ploughe<sup>mmmm,4</sup>, Robert M. Plowes<sup>nnn</sup>, Cristy Portales-Reyes<sup>nnnn</sup>, Suzanne M Prober<sup>vvv</sup>, Yolanda Pueyo<sup>x</sup>, Sasha C. Reed<sup>oooo</sup>, Euan G. Ritchie<sup>pppp</sup>, Dana Aylén Rodríguez<sup>sss</sup>, William E. Rogers<sup>bbb</sup>, Christiane Roscher<sup>dd,qqqq</sup>, Ana M. Sánchez<sup>rrr</sup>, Bráulio A. Santos<sup>ssss</sup>, María Cecilia Scarfó<sup>sss</sup>, Eric W. Seabloom<sup>e</sup>, Baoku Shi<sup>ttt</sup>, Lara Souza<sup>cccc,uuuu</sup>, Andreas Stampfli<sup>www,vvvv,wwww</sup>, Rachel J. Standish<sup>vvvv,xxxx</sup>, Marcelo Sternberg<sup>z</sup>, Wei Sun<sup>ttt</sup>, Marie Sünemann<sup>dd,xx</sup>, Michelle Tedder<sup>yyyy</sup>, Pål Thorvaldsen<sup>zzzz</sup>, Dashuan Tian<sup>aaaaa</sup>, Katja Tielbörger<sup>bbbb</sup>, Alejandro Valdecantos<sup>p,q</sup>, Liesbeth van den Brink<sup>bbbb</sup>, Vigdis Vandvik<sup>ccc</sup>, Mathew R. Vankoughnett<sup>cccc</sup>, Liv Guri Velle<sup>dddd</sup>, Changhui Wang<sup>eeee</sup>, Yi Wang<sup>ttt</sup>, Glenda M. Wardle<sup>uu</sup>, Cunzheng Wei<sup>ffff</sup>, Christiane Werner<sup>kkk</sup>, Georg Wiehl<sup>vvv</sup>, Jennifer L. Williams<sup>gggg</sup>,

Amelia A. Wolf<sup>fhhhh</sup>, Michaela Zeiter<sup>www,vvvv,wwww</sup>, Fawei Zhang<sup>iiii</sup>, Juntao Zhu<sup>aaaa</sup>, Ning Zong<sup>aaaaa</sup>, Xiaoan Zuo<sup>iiii</sup>

**Author Affiliations:**

- <sup>a</sup>Department of Biology, Colorado State University, Fort Collins, CO 80523  
<sup>b</sup>Graduate Degree Program in Ecology, Colorado State University, Fort Collins, CO 80523;  
<sup>c</sup>Denver Zoo, Denver, CO 80205  
<sup>d</sup>Department of Wildland Resource and the Ecology Center, Utah State University, Logan, UT 84322  
<sup>e</sup>Department of Ecology, Evolution, and Behavior, University of Minnesota, Saint Paul, MN 55108  
<sup>f</sup>Department of Biology, University of New Mexico, Albuquerque, NM 87131  
<sup>g</sup>School of Life Sciences, Global Drylands Center, Arizona State University, Tempe, AZ 85281  
<sup>h</sup>Department of Global Ecology, Carnegie Institution for Science, Stanford, CA 94305  
<sup>i</sup>Department of Biology, Indiana University. Bloomington, IN 47405  
<sup>j</sup>Instituto de Investigaciones Fisiológicas y Ecológicas Vinculadas a la Agricultura (IFEVA), National Scientific and Technical Research Council (CONICET), Faculty of Agronomy, University of Buenos Aires, Buenos Aires C1417DSE, Argentina  
<sup>k</sup>Department of Environmental Science, Policy, and Management, University of California, Berkeley, CA 94720  
<sup>l</sup>Department of Geosciences and Natural Resource Management, University of Copenhagen, Rolighedsvej 23, Frederiksberg C 1958, Denmark  
<sup>m</sup>Department of Natural Resource Science, Thompson Rivers University, Kamloops, BC V2C 0C8, Canada  
<sup>n</sup>Department of Disturbance Ecology and Vegetation Dynamics, Bayreuth Center of Ecology and Environmental Research, Bayreuth 95447, Germany  
<sup>o</sup>Department of Environmental Studies, University of California, Santa Cruz, CA 95064  
<sup>p</sup>Departamento de Ecología, Universidad de Alicante, 03690Alicante, Spain  
<sup>q</sup>Instituto Multidisciplinar para el Estudio del Medio “Ramón Margalef”, Universidad de Alicante, 03690Alicante, Spain  
<sup>r</sup>Hawkesbury Institute for the Environment, Western Sydney University, Locked Bag 1797, Penrith, NSW 2751, Australia  
<sup>s</sup>School of Grassland Science, Beijing Forestry University, Beijing 100083, China  
<sup>t</sup>Department of Land Resources and Environmental Sciences, Montana State University, Bozeman, MT 59717  
<sup>u</sup>U.S. Geological Survey, Southwest Biological Science Center, Flagstaff, AZ 86001  
<sup>v</sup>Soil and Crop Sciences Section, School of Integrative Plant Science, Cornell University, Ithaca, NY 14853  
<sup>w</sup>Department of Range Management, Faculty of Natural Resources and Marine Sciences, Tarbiat Modares University, Noor 46417-76489, Iran  
<sup>x</sup>Departamento de Biodiversidad y Restauración, Instituto Pirenaico de Ecología, Consejo Superior de Investigaciones Científicas (CSIC), Zaragoza 50059, Spain  
<sup>y</sup>Laboratorio de Ecología, Instituto de Investigaciones Marinas y Costeras (IIMyC), Universidad Nacional de Mar del Plata (UNMdP)-Consejo Nacional de Investigación Ciencia y Técnica (CONICET), CC 1260 Correo Central, Mar del Plata B7600WAG, Argentina

- <sup>z</sup>School of Plant Sciences and Food Security, Faculty of Life Sciences, Tel Aviv University, Tel Aviv 69978, Israel
- <sup>aa</sup>School of Ecology and Environment, Ningxia University, Yinchuan 750021, China
- <sup>bb</sup>City of Boulder Open Space and Mountain Parks, Boulder, CO 80301
- <sup>cc</sup>Department of Community Ecology, Helmholtz-Centre for Environmental Research - UFZ, Halle 06120, Germany
- <sup>dd</sup>German Centre for Integrative Biodiversity Research (iDiv) Halle-Jena-Leipzig, Leipzig 04103, Germany
- <sup>ee</sup>Division of Biology, Kansas State University, Manhattan, KS, USA 66506
- <sup>ff</sup>LI-COR Biosciences, 4647 Superior Street, Lincoln, NE 68505
- <sup>gg</sup>Department of Ecology, University of Innsbruck, Innsbruck 6020, Austria
- <sup>hh</sup>Department of Biological Sciences, University of Alberta, Edmonton, AB T6G 2E9, Canada
- <sup>ii</sup>Department of Agricultural, Food and Nutritional Science, University of Alberta, Edmonton, AB T6G 2P5, Canada
- <sup>jj</sup>Institute of Crop Science and Resource Conservation, Department of Plant Nutrition, University of Bonn, Bonn 53115, Germany
- <sup>kk</sup>Institute of Botany and Landscape Ecology, Department of Experimental Plant Ecology, University of Greifswald, Greifswald D-17498, Germany
- <sup>ll</sup>Biological Station of Hiddensee, Department of Biology, University of Greifswald, Kloster D-18565, Germany
- <sup>mmm</sup>Department of Environmental Science and Management, California State Polytechnic University, Humboldt, Arcata, CA 95521
- <sup>nn</sup>Universidad Nacional de Río Negro, Centro de Estudios Ambientales desde la NorPatagonia (CEANPa), Sede Atlántica-CONICET, Viedma 8500, Argentina
- <sup>oo</sup>Department of Chemistry, Life Sciences and Environmental Sustainability, University of Parma, Parma I-43124, Italy
- <sup>pp</sup>Department of Renewable Resources, University of Alberta, Edmonton, AB T6G 2E3, Canada
- <sup>qq</sup>Department of Ecology, Universidade Federal de Goiás, Goiânia - GO, 74690-900, Brazil
- <sup>rr</sup>Department of Ecosystem Science and Sustainability, Colorado State University, Fort Collins, CO 80523
- <sup>ss</sup>Department of Ecology, Evolution, and Marine Biology, University of California, Santa Barbara, CA 93106
- <sup>tt</sup>US Army Engineer Research and Development Center, Environmental Laboratory, Vicksburg, MS 39180
- <sup>uu</sup>School of Life and Environmental Sciences, The University of Sydney, Camperdown, NSW 2006, Australia
- <sup>vv</sup>Isotope Biogeochemistry and Gas Fluxes, Leibniz-Zentrum für Agrarlandschaftsforschung (ZALF), Müncheberg 15374, Germany
- <sup>ww</sup>Institute of Ecology and Evolution, Friedrich Schiller University Jena, Jena 07743, Germany
- <sup>xx</sup>Institute of Biology, Leipzig University, Leipzig 04103, Germany
- <sup>yy</sup>Department of Ecology, Universidade Federal do Rio Grande do Sul - UFRGS, Porto Alegre 91501-970, Brazil
- <sup>zz</sup>Centro de Investigaciones sobre Desertificación, Consejo Superior de Investigaciones Científicas (CSIC) - Universitat Valencia (UV) - Generalitat Valenciana (GV), Valencia 46113, Spain
- <sup>aaa</sup>Geobotany, Faculty of Biology, University of Freiburg, Freiburg D-79104, Germany

- <sup>bbb</sup>Department of Ecology and Conservation Biology, Texas A&M University, College Station, TX 77843
- <sup>ccc</sup>Department of Biological Sciences, University of Bergen, Bergen 5007, Norway
- <sup>ddd</sup>Ecology and Biodiversity Group, Department of Biology, Utrecht University, Utrecht 3584 CH, Netherlands
- <sup>eee</sup>Department of Biology, University of Western Ontario, London, ON N6A 5B7, Canada
- <sup>fff</sup>U.S. Army Corps of Engineers, Sacramento, CA 95814
- <sup>ggg</sup>Department of Soil and Crop Sciences, Colorado State University, Fort Collins, CO 80523
- <sup>hhh</sup>Mad Agriculture, Boulder, CO 80302
- <sup>iii</sup>Centre for Ecological Research, Institute of Ecology and Botany, Vácrátót 2163, Hungary;
- <sup>jjj</sup>Departamento de Gestión Agropecuaria, Universidad Nacional del Comahue, Centro Universitario Regional Zona Atlántica, Viedma 85009, Argentina
- <sup>kkk</sup>Ecosystem Physiology, Faculty of Environment and Natural Resources, Albert-Ludwig-University of Freiburg, Freiburg 79110, Germany
- <sup>lll</sup>Department of Plant Sciences, University of Saskatchewan, Saskatoon, SK S7N5A8, Canada
- <sup>mmm</sup>Range and Meadow Forage Management Research, Eastern Oregon Agricultural Research Center, US Department of Agriculture (USDA)-Agricultural Research Service, Burns, OR 97720
- <sup>nnn</sup>Brackenridge Field Laboratory, University of Texas, Austin, TX 78747
- <sup>ooo</sup>Department of Biodiversity Research and Systematic Botany, University of Potsdam, Potsdam 14469, Germany
- <sup>ppp</sup>Prataculture Research Institute, Heilongjiang Academy of Agricultural Sciences, Haerbin 150086, China
- <sup>qqq</sup>Key Laboratory of Forest Ecology and Environment of National Forestry and Grassland Administration, Ecology and Nature Conservation Institute, Chinese Academy of Forestry, Beijing 100091, China
- <sup>rrr</sup>Programa de Posgrado en Desarrollo y Medio Ambiente - Universidade Federal da Paraíba, Cidade Universitária, Castelo Branco, João Pessoa PB 58051-900, Brazil
- <sup>sss</sup>Centro de Recursos Naturales Renovables de la Zona Semiárida (CERZOS) – CONICET, Departamento de Biología, Bioquímica y Farmacia, Universidad Nacional del Sur, Bahía Blanca 8000FTN, Argentina
- <sup>ttt</sup>Institute of Resources and Environment, International Centre for Bamboo and Rattan, Key Laboratory of National Forestry and Grassland Administration and Beijing for Bamboo & Rattan Science and Technology, Beijing 100102, China
- <sup>uuu</sup>Institute of Botany, Czech Academy of Sciences, Třeboň 379 01, Czech Republic
- <sup>vvv</sup>Commonwealth Scientific and Industrial Research Organization (CSIRO) Environment, Wembley WA 6913, Australia
- <sup>www</sup>School of Agricultural, Forest and Food Sciences, Bern University of Applied Sciences, Zollikofen 3052, Switzerland
- <sup>xxx</sup>Department of Ecology and Evolutionary Biology, Institute for Arctic and Alpine Research, University of Colorado, Boulder, CO 80309
- <sup>yyy</sup>Department of Ecology and Environmental Science, Umeå University, Umeå S-901 87, Sweden
- <sup>zzz</sup>Research Center for Advanced Science and Technology, University of Tokyo, Meguro, Tokyo 153-8904, Japan

- <sup>aaaa</sup>Graduate School of Environment and Information Sciences, Yokohama National University,  
Yokohama 240-8501, Japan
- <sup>bbbb</sup>Conservancy-Communities Living Among Wildlife Sustainably (CLAWS) Botswana,  
Seronga 00000, Botswana
- <sup>cccc</sup>School of Biological Sciences, University of Oklahoma, Norman, OK 73019
- <sup>dddd</sup>Gulbali Institute, Charles Sturt University, Albury, NSW 2640, Australia
- <sup>eeee</sup>Global Ecology Unit Center for Ecological Research and Forestry Applications (CREAF)-  
National Research Council (CSIC)-Universitat Autònoma de Barcelona (UAB), CSIC,  
Bellaterra, Catalonia 08194, Spain
- <sup>ffff</sup>Center for Ecological Research and Forestry Applications (CREAF), Cerdanyola del Vallès,  
Barcelona, Catalonia 08193, Spain
- <sup>gggg</sup>Department of Environment and Society, Utah State University, Moab, UT, USA, 84532
- <sup>hhhh</sup>Department of Biology, The University of Winnipeg, 515 Portage Ave, Winnipeg, MB R3B  
2E9, Canada
- <sup>iiii</sup>Institute of Ecology and Earth Sciences, University of Tartu, Tartu EE50409, Estonia
- <sup>jjjj</sup>Instituto Nacional de Tecnología Agropecuaria (INTA) - Universidad Nacional de la Patagonia  
Austral (UNPA) - CONICET, Río Gallegos, Caleta Olivia Z9011, Argentina
- <sup>kkkk</sup>Université Clermont Auvergne, National Research Institute for Agriculture, Food and the  
Environment (INRAE), VetAgro Sup, Research Unit for Grassland Ecosystems (UREP),  
Clermont-Ferrand 63000, France
- <sup>llll</sup>Laboratório de Ecologia Aplicada e Conservação, Departamento de Sistemática e Ecologia,  
Universidade Federal da Paraíba, Cidade Universitária, Castelo Branco, João Pessoa PB 58051-  
900, Brazil
- <sup>mmmm</sup>Department of Biological Sciences, Purdue University, West Lafayette, IN 47907
- <sup>nnnn</sup>Department of Biology, Saint Louis University, St. Louis, MO 63103
- <sup>oooo</sup>U.S. Geological Survey, Southwest Biological Science Center, Moab, UT 84532
- <sup>pppp</sup>Centre for Integrative Ecology, School of Life and Environmental Sciences, Deakin  
University, Burwood, VIC 3125, Australia
- <sup>qqqq</sup>Department of Physiological Diversity, Helmholtz-Centre for Environmental Research -  
UFZ, Leipzig 04318, Germany
- <sup>rrrr</sup>Department of Biology and Geology, Rey Juan Carlos University, Madrid 28032, Spain
- <sup>ssss</sup>Departamento de Sistemática e Ecologia, Universidade Federal da Paraíba. Cidade  
Universitária, Castelo Branco, João Pessoa PB 58051-900, Brazil
- <sup>tttt</sup>Institute of Grassland Science, Key Laboratory of Vegetation Ecology of the Ministry of  
Education, Jilin Songnen Grassland Ecosystem National Observation and Research Station,  
Northeast Normal University, Changchun 130024, China
- <sup>uuuu</sup>Oklahoma Biological Survey, University of Oklahoma, Norman, OK 73019
- <sup>vvvv</sup>Institute of Plant Sciences, University of Bern, Bern 3013, Switzerland
- <sup>wwww</sup>Oeschger Center for Climate Change Research, University of Bern, Bern 3012, Switzerland
- <sup>xxxx</sup>Environmental and Conservation Sciences, Murdoch University, Murdoch, WA 6150,  
Australia
- <sup>yyyy</sup>School of Life Sciences, University of KwaZulu-Natal, Pietermaritzburg 3201, South Africa
- <sup>zzzz</sup>Norwegian Institute of Bioeconomy Research, Department of Landscape and Biodiversity,  
Tjøtta 8860, Norway
- <sup>aaaaa</sup>Key Laboratory of Ecosystem Network Observation and Modeling, Institute of Geographic  
Sciences and Natural Resources Research, Chinese Academy of Sciences, Beijing 100101, China

<sup>bbbb</sup>Plant Ecology Group, Department of Biology, University of Tübingen, Tübingen 72076,  
Germany

<sup>cccc</sup>Nova Scotia Community College, Annapolis Valley Campus, Applied Research, Middleton,  
NS B0S 1P0, Canada

<sup>dddd</sup>Møreforskning, Aalesund 6021, Norway

<sup>eeee</sup>College of Grassland Science, Shanxi Agricultural University, Jinzhong 030801, China

<sup>ffff</sup>State Key Laboratory of Vegetation and Environmental Change, Institute of Botany, Chinese  
Academy of Sciences, Beijing 100093, China

<sup>gggg</sup>Department of Geography and Biodiversity Research Centre, University of British  
Columbia, Vancouver, BC V6T 1Z4, Canada

<sup>hhhh</sup>Department of Integrative Biology, University of Texas, Austin, TX 78712

<sup>iiii</sup>Key Laboratory of Adaptation and Evolution of Plateau Biota, Northwest Institute of Plateau  
Biology, Chinese Academy of Sciences, Xining, Qinghai 810008, China

<sup>jjjj</sup>Urat Desert-grassland Research Station, Northwest Institute of Eco-Environment and  
Resources, Chinese Academy of Science, Lanzhou 730000, China

<sup>1</sup>M.D.S. and K.D.W. contributed equally to this work.

<sup>2</sup>To whom correspondence may be addressed. Email: [melinda.smith@colostate.edu](mailto:melinda.smith@colostate.edu).

<sup>3</sup>Present address: Geo-konzept Society of Environmental Planning mbH, Adelschlag D-85111,  
Germany.

<sup>4</sup>Present address: National Park Service, 2255 N Gemini Rd, Flagstaff, AZ 86001.

**This PDF file includes:**

Figs. S1 to S2

Tables S1 to S11

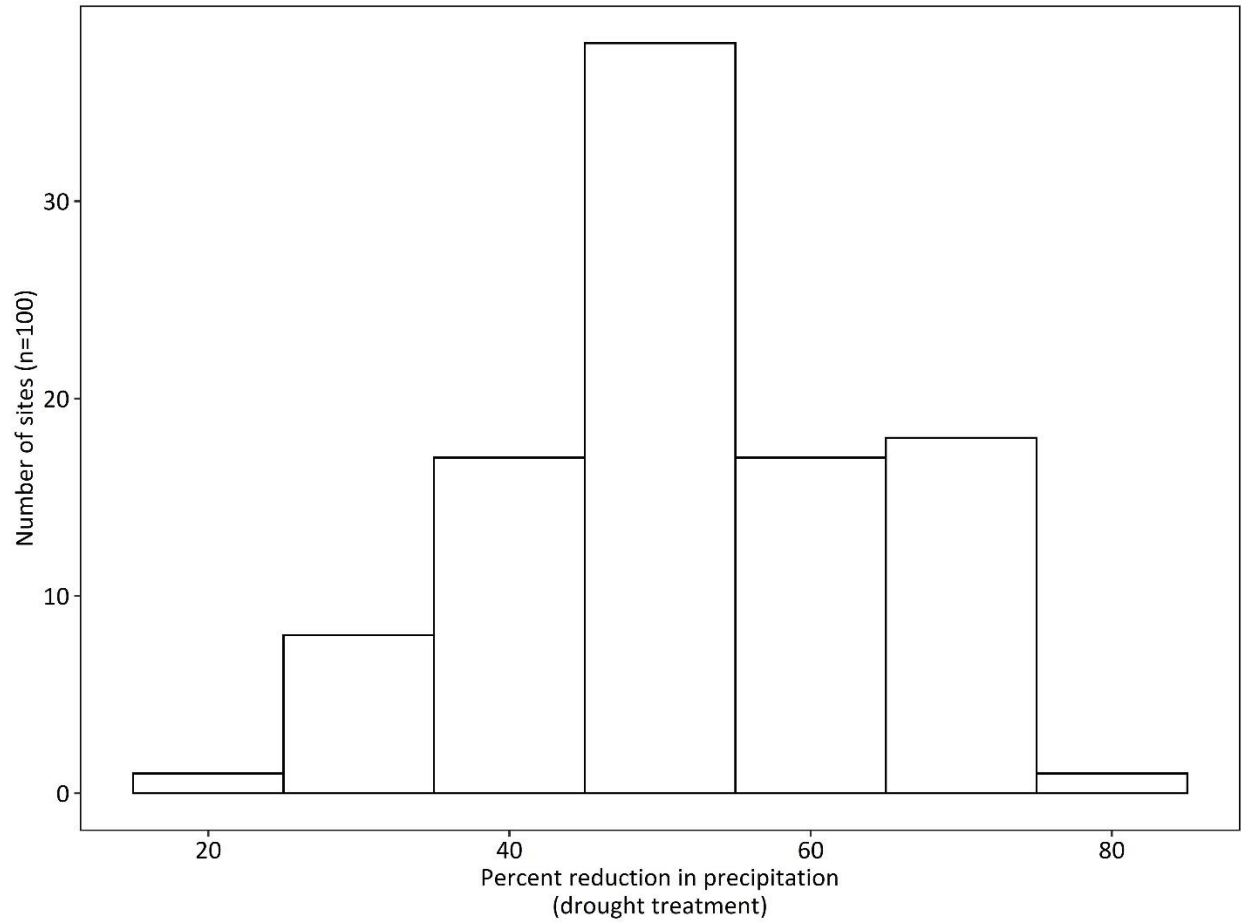

**Figure S1.** Frequency of sites imposing a level of percent reduction in precipitation for the extreme drought treatment. Bars represent 10% reduction in precipitation.

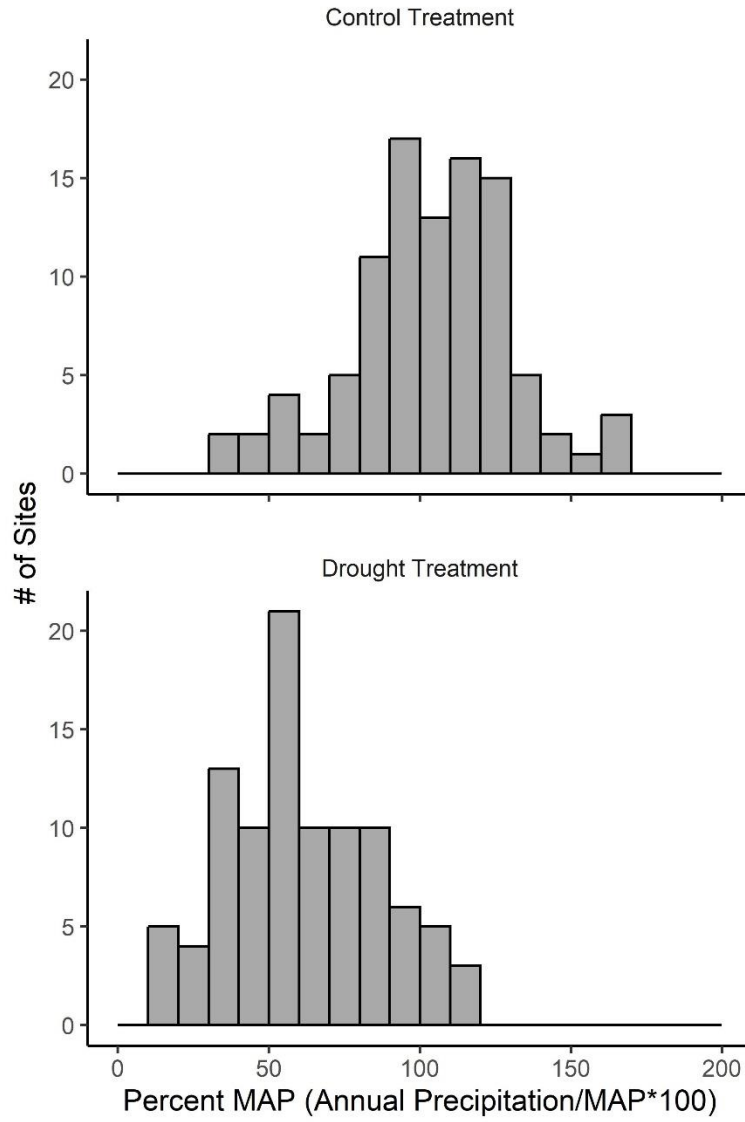

**Figure S2.** Percent of mean annual precipitation (MAP) received in drought vs. control plots.



**Table S1.** Full list of author contributions and funding sources. \*Author contribution codes: 1= Idea generation; 2= Data management and analysis; 3= Manuscript writing; 4= Manuscript editing; 5= Code checking and clean up; 6= Site manager and/or data contributor; 7= Site PI; 8= IDE PI or Steering Committee Member

| Full name            | Author Contributions* |   |   |   |   |   |   |   |
|----------------------|-----------------------|---|---|---|---|---|---|---|
|                      | 1                     | 2 | 3 | 4 | 5 | 6 | 7 | 8 |
| Melinda D. Smith     | X                     |   | X |   |   | X | X | X |
| Kate D. Wilkins      | X                     | X | X |   | X | X |   |   |
| Martin C. Holdrege   |                       | X |   | X | X | X |   |   |
| Peter Wilfahrt       | X                     | X |   | X |   |   |   |   |
| Scott L. Collins     | X                     |   | X | X |   |   | X | X |
| Alan K. Knapp        | X                     |   | X | X |   | X |   | X |
| Oswaldo E Sala       | X                     |   | X | X |   | X | X | X |
| Jeffrey S. Dukes     | X                     |   |   |   |   |   |   | X |
| Richard P. Phillips  | X                     | X |   | X |   |   | X | X |
| Laura Yahdjian       |                       |   |   | X |   | X | X | X |
| Laureano A. Gherardi |                       | X |   | X |   |   |   |   |
| Timothy Ohlert       |                       | X |   |   |   | X | X |   |
| Claus Beier          | X                     |   |   |   |   |   |   | X |
| Lauchlan H. Fraser   |                       |   |   |   |   | X | X | X |
| Anke Jentsch         |                       |   |   | X |   | X | X | X |
| Michael E. Loik      | X                     |   |   |   |   | X | X | X |
| Fernando T. Maestre  |                       |   |   | X |   | X | X | X |
| Sally A. Power       |                       |   |   | X |   | X | X | X |
| Qiang Yu             |                       |   |   | X |   | X | X | X |
| Andrew J. Felton     |                       | X |   | X |   |   |   |   |
| Seth M. Munson       |                       |   |   | X |   | X | X |   |
| Yiqi Luo             |                       |   |   |   |   |   |   | X |
| Hamed Abdoli         |                       |   |   |   |   | X | X |   |
| Mehdi Abedi          |                       |   |   |   |   | X | X |   |
| Concepción L. Alados |                       |   |   |   |   | X | X |   |
| Juan Alberti         |                       |   |   | X |   | X | X |   |
| Moshe Alon           |                       |   |   |   |   | X |   |   |
| Hui An               |                       |   |   |   |   | X |   |   |
| Brian Anacker        |                       |   |   | X |   | X |   |   |
| Maggie Anderson      |                       |   |   | X |   | X |   |   |
| Harald Auge          |                       |   |   |   |   | X | X |   |
| Seton Bachle         |                       |   |   |   |   | X | X |   |
| Khadijeh Bahalkeh    |                       |   |   |   |   | X | X |   |
| Michael Bahn         |                       |   |   | X |   | X | X |   |
| Amгаа Batbaatar      |                       |   |   |   |   | X |   |   |
| Taryn Bauerle        |                       |   |   |   |   | X | X |   |

| Full name                  | Author Contributions* |   |   |   |   |   |   |   |
|----------------------------|-----------------------|---|---|---|---|---|---|---|
|                            | 1                     | 2 | 3 | 4 | 5 | 6 | 7 | 8 |
| Karen H. Beard             |                       |   |   |   |   | X | X |   |
| Kai Behn                   |                       |   |   |   |   | X |   |   |
| Ilka Beil                  |                       |   |   |   |   | X |   |   |
| Lucio Biancari             |                       |   |   | X |   | X |   |   |
| Irmgard Blindow            |                       |   |   |   |   | X |   |   |
| Viviana Florencia Bondaruk |                       |   |   | X |   | X | X |   |
| Elizabeth T. Borer         |                       |   |   | X |   | X | X |   |
| Edward W. Bork             |                       |   |   |   |   | X |   |   |
| Carlos Martin Bruschetti   |                       |   |   | X |   | X | X |   |
| Kerry M. Byrne             |                       |   |   | X |   | X | X |   |
| James F. Cahill Jr.        |                       |   |   |   |   | X | X |   |
| Dianela A. Calvo           |                       |   |   |   |   | X |   |   |
| Michele Carbognani         |                       |   |   | X |   | X |   |   |
| Augusto Cardoni            |                       |   |   |   |   | X |   |   |
| Cameron N. Carlyle         |                       |   |   |   |   | X | X |   |
| Miguel Castillo-Garcia     |                       |   |   |   |   | X |   |   |
| Scott X. Chang             |                       |   |   |   |   | X |   |   |
| Jeff Chieppa               |                       |   |   | X |   | X | X |   |
| Marcus V. Cianciaruso      |                       |   |   |   |   | X | X |   |
| Ofer Cohen                 |                       |   |   |   |   | X |   |   |
| Amanda L. Cordeiro         |                       |   |   | X |   | X |   |   |
| Daniela F. Cusack          |                       |   |   | X |   | X | X |   |
| Sven Dahlke                |                       |   |   |   |   | X |   |   |
| Pedro Daleo                |                       |   |   | X |   | X | X |   |
| Carla M. D'Antonio         |                       |   |   |   |   | X | X |   |
| Lee H. Dietterich          |                       |   |   | X |   | X |   |   |
| Tim S. Doherty             |                       |   |   |   |   | X | X |   |
| Maren Dubbert              |                       |   |   | X |   | X | X |   |
| Anne Ebeling               |                       |   |   |   |   | X | X |   |
| Nico Eisenhauer            |                       |   |   |   |   | X | X |   |
| Felícia M. Fischer         |                       |   |   |   |   | X |   |   |
| T'ai G. W. Forte           |                       |   |   | X |   | X |   |   |
| Tobias Gebauer             |                       |   |   | X |   | X | X |   |
| Beatriz Gozalo             |                       |   |   |   |   | X |   |   |
| Aaron C. Greenville        |                       |   |   | X |   | X |   |   |
| Karlo G. Guidoni-Martins   |                       |   |   |   |   | X | X |   |
| Heather J. Hannusch        |                       | X |   | X |   | X |   |   |
| Siri Vatsø Haugum          |                       |   |   |   |   | X |   |   |
| Yann Hautier               |                       |   |   | X |   | X | X |   |
| Mariet Hefting             |                       |   |   | X |   | X |   |   |
| Hugh A. L. Henry           |                       |   |   | X |   | X | X |   |

| Full name              | Author Contributions* |   |   |   |   |   |   |   |
|------------------------|-----------------------|---|---|---|---|---|---|---|
|                        | 1                     | 2 | 3 | 4 | 5 | 6 | 7 | 8 |
| Daniela Hoss           |                       |   |   | X |   | X |   |   |
| Johannes Ingrisch      |                       |   |   |   |   | X |   |   |
| Oscar Iribarne         |                       |   |   | X |   | X | X |   |
| Forest Isbell          |                       |   |   | X |   | X | X |   |
| Yari Johnson           |                       |   |   |   |   | X | X |   |
| Samuel Jordan          |                       |   |   |   |   | X |   |   |
| Eugene F. Kelly        |                       |   |   |   |   | X |   |   |
| Kaitlin Kimmel         |                       |   |   | X |   | X |   |   |
| Juergen Kreyling       |                       |   |   |   |   | X | X |   |
| György Kröel-Dulay     |                       |   |   | X |   | X | X |   |
| Alicia Kröpfl          |                       |   |   |   |   | X | X |   |
| Angelika Kübert        |                       |   |   | X |   | X |   |   |
| Andrew Kulmatiski      |                       |   |   |   |   | X | X |   |
| Eric G. Lamb           |                       |   |   |   |   | X | X |   |
| Klaus Steenberg Larsen |                       |   |   |   |   | X | X |   |
| Julie Larson           |                       |   |   | X |   | X | X |   |
| Jason Lawson           |                       |   |   |   |   | X |   |   |
| Cintia V. Leder        |                       |   |   |   |   | X |   |   |
| Anja Linstädter        |                       |   |   | X |   |   | X |   |
| Jielin Liu             |                       |   |   |   |   | X |   |   |
| Shirong Liu            |                       |   |   | X |   | X |   |   |
| Alexandra G. Lodge     |                       | X |   | X |   | X |   |   |
| Grisel Longo           |                       |   |   | X |   | X |   |   |
| Alejandro Loydi        |                       |   |   | X |   | X | X |   |
| Junwei Luan            |                       |   |   | X |   | X | X |   |
| Frederick Curtis Lubbe |                       |   |   |   |   | X |   |   |
| Craig Macfarlane       |                       |   |   |   |   | X | X |   |
| Kathleen Mackie-Haas   |                       |   |   | X |   | X |   |   |
| Andrey V. Malyshev     |                       |   |   |   |   | X | X |   |
| Adrián Maturano-Ruiz   |                       |   |   |   |   | X |   |   |
| Thomas Merchant        |                       |   |   |   |   | X |   |   |
| Daniel B. Metcalfe     |                       |   | X | X |   |   | X |   |
| Akira S. Mori          |                       |   |   |   |   | X | X |   |
| Edwin Mudongo          |                       |   |   |   |   | X |   |   |
| Gregory S. Newman      |                       |   |   | X |   | X | X |   |
| Uffe N. Nielsen        |                       |   |   |   |   | X | X |   |
| Dale Nimmo             |                       |   |   |   |   | X | X |   |
| Yujie Niu              |                       |   |   | X |   | X |   |   |
| Paola Nobre            |                       |   |   |   |   | X |   |   |
| Rory C. O'Connor       |                       |   |   | X |   | X | X |   |
| Romà Ogaya             |                       |   |   |   |   | X |   |   |

| Full name                  | Author Contributions* |   |   |   |   |   |   |   |
|----------------------------|-----------------------|---|---|---|---|---|---|---|
|                            | 1                     | 2 | 3 | 4 | 5 | 6 | 7 | 8 |
| Gastón R. Oñatibia         |                       |   |   | X |   | X | X |   |
| Ildikó Orbán               |                       |   |   | X |   | X |   |   |
| Brooke Osborne             |                       |   |   | X |   | X | X |   |
| Rafael Otfinowski          |                       |   |   |   |   | X | X |   |
| Meelis Pärtel              |                       |   |   | X |   | X | X |   |
| Josep Penuelas             |                       |   |   |   |   | X | X |   |
| Pablo L. Peri              |                       |   |   |   |   | X | X |   |
| Guadalupe Peter            |                       |   |   | X |   | X | X |   |
| Alessandro Petraglia       |                       |   |   | X |   | X | X |   |
| Catherine Picon-Cochard    |                       |   |   | X |   | X | X |   |
| Valério D. Pillar          |                       |   |   |   |   | X | X |   |
| Juan Manuel Piñeiro-Guerra |                       |   |   | X |   | X | X |   |
| Laura W. Ploughe           |                       |   |   |   |   | X |   |   |
| Robert M. Plowes           |                       |   |   | X |   | X | X |   |
| Cristy Portales-Reyes      |                       |   |   | X |   | X |   |   |
| Suzanne M. Prober          |                       |   |   | X |   | X |   |   |
| Yolanda Pueyo              |                       |   |   |   |   | X | X |   |
| Sasha C. Reed              |                       |   |   | X |   | X | X |   |
| Euan G. Ritchie            |                       |   |   |   |   | X | X |   |
| Dana Aylén Rodríguez       |                       |   |   | X |   | X |   |   |
| William E. Rogers          | X                     |   |   | X |   | X | X |   |
| Christiane Roscher         |                       |   |   |   |   | X | X |   |
| Ana M. Sánchez             |                       |   |   |   |   | X |   |   |
| Bráulio A. Santos          |                       |   |   | X |   | X |   |   |
| María Cecilia Scarfó       |                       |   |   | X |   | X |   |   |
| Eric W. Seabloom           |                       |   |   | X |   | X | X |   |
| Baoku Shi                  |                       |   |   |   |   | X |   |   |
| Lara Souza                 |                       |   |   |   |   | X | X |   |
| Andreas Stampfli           |                       |   |   | X |   | X | X |   |
| Rachel J. Standish         |                       | X |   | X |   | X | X |   |
| Marcelo Sternberg          |                       |   |   | X |   | X | X | X |
| Wei Sun                    |                       |   |   |   |   | X | X |   |
| Marie Sünemann             |                       |   |   | X |   | X |   |   |
| Michelle Tedder            |                       |   |   | X |   | X | X |   |
| Pål Thorvaldsen            |                       |   |   |   |   | X | X |   |
| Dashuan Tian               |                       |   |   |   |   | X |   |   |
| Katja Tielbörger           |                       |   |   |   |   | X | X |   |
| Alejandro Valdecantos      |                       |   |   |   |   | X | X |   |
| Liesbeth van den Brink     |                       |   |   | X |   | X |   |   |
| Vigdis Vandvik             |                       |   |   | X |   | X | X |   |
| Mathew R. Vankoughnett     |                       |   |   |   |   | X | X |   |

| Full name            | Author Contributions* |   |   |   |   |   |   |   |
|----------------------|-----------------------|---|---|---|---|---|---|---|
|                      | 1                     | 2 | 3 | 4 | 5 | 6 | 7 | 8 |
| Liv Guri Velle       |                       |   |   | X |   | X |   |   |
| Changhui Wang        |                       |   |   |   |   | X |   |   |
| Yi Wang              |                       |   |   |   |   | X |   |   |
| Glenda M. Wardle     |                       |   |   | X |   | X | X |   |
| Cunzheng Wei         |                       |   |   |   |   | X |   |   |
| Christiane Werner    |                       |   |   | X |   | X | X |   |
| Georg Wiehl          |                       |   |   |   |   | X |   |   |
| Jennifer L. Williams |                       |   |   | X |   | X | X |   |
| Amelia A. Wolf       |                       |   |   |   |   | X | X |   |
| Michaela Zeiter      |                       |   |   | X |   | X | X |   |
| Fawei Zhang          |                       |   |   |   |   | X |   |   |
| Juntao Zhu           |                       |   |   |   |   | X |   |   |
| Ning Zong            |                       |   |   |   |   | X |   |   |
| Xiaoan Zuo           |                       |   |   |   |   | X |   |   |

**Table S2.** Information on IDE sites (n=100), including site codes that combine the site names and two-letter country codes. The table also provides information on country (Loc = two letter country codes), continent (Cont.) for each site, the ecosystem type (Eco type), latitude (Lat), longitude (Long), mean annual precipitation (MAP, mm), mean annual temperature (MAT, °C), the number of days the drought was imposed (Trt days), the ambient precipitation received in the year biomass was harvested (Amb precip), the target level of precipitation reduction (Target % precip reduc), the actual percent reduction achieved for the drought treatment in the year biomass was harvested (Actual % precip reduc; calculated as the percent reduction in precipitation received in drought versus ambient plots).

| Site name                  | Site code   | Loc. | Cont.         | Eco type  | Lat    | Long    | MAP    | MAT   | Trt days | Ambient precip | Target % precip reduc | Actual % precip reduc |
|----------------------------|-------------|------|---------------|-----------|--------|---------|--------|-------|----------|----------------|-----------------------|-----------------------|
| Allmend Brachy             | allmendb.ch | CH   | Europe        | Grassland | 46.75  | 7.59    | 957.00 | 8.90  | 197      | 1080.43        | 32.00                 | 23.26                 |
| Allmend Ovina              | allmendo.ch | CH   | Europe        | Grassland | 46.75  | 7.59    | 957.00 | 8.90  | 197      | 1080.43        | 33.00                 | 23.99                 |
| Antelope                   | antelope.us | US   | North America | Grassland | 35.58  | -111.51 | 215.00 | 12.50 | 123      | 349.17         | 50.00                 | 31.92                 |
| Ayora Experimental Station | ayora.es    | ES   | Europe        | Shrubland | 39.12  | -0.95   | 381.30 | 14.60 | 269      | 387.30         | 74.87                 | 60.80                 |
| Bad Drought                | baddrt.de   | DE   | Europe        | Grassland | 51.39  | 11.88   | 488.60 | 8.90  | 201      | 423.60         | 55.00                 | 34.85                 |
| GCN-Bange                  | bange.cn    | CN   | Asia          | Grassland | 31.38  | 90.23   | 428.00 | -0.26 | 221      | 440.54         | 50.00                 | 31.95                 |
| Bayreuth                   | bayrdrt.de  | DE   | Europe        | Grassland | 49.92  | 11.58   | 724.00 | 8.20  | 417      | 695.70         | 40.00                 | 40.00                 |
| BFL                        | bfl.us      | US   | North America | Grassland | 30.28  | -97.78  | 860.53 | 20.38 | 349      | 856.50         | 50.00                 | 45.80                 |
| Biddulph                   | biddulph.ca | CA   | North America | Grassland | 51.91  | -106.72 | 353.70 | 2.60  | 453      | 413.90         | 47.50                 | 36.26                 |
| Boulder Drought            | bldrdr.us   | US   | North America | Grassland | 39.92  | -105.23 | 487.70 | 10.70 | 448      | 485.67         | 66.00                 | 39.77                 |
| Broken Hill                | brokenh.au  | AU   | Australia     | Grassland | -31.98 | 141.56  | 283.00 | 18.30 | 383      | 123.20         | 65.00                 | 65.00                 |

| Site name                     | Site code      | Loc. | Cont.         | Eco type  | Lat    | Long    | MAP     | MAT   | Trt days | Ambient precip | Target % precip reduc | Actual % precip reduc |
|-------------------------------|----------------|------|---------------|-----------|--------|---------|---------|-------|----------|----------------|-----------------------|-----------------------|
| Brookdale                     | brookdale.ca   | CA   | North America | Grassland | 50.05  | -99.92  | 474.20  | 2.20  | 470      | 348.39         | 32.00                 | 32.00                 |
| McDowell Mountain             | capmcd.us      | US   | North America | Shrubland | 33.64  | -111.72 | 204.00  | 24.00 | 376      | 264.40         | 66.00                 | 66.00                 |
| White Tank Mountain           | capwhite.us    | US   | North America | Shrubland | 33.60  | -112.50 | 204.00  | 24.00 | 373      | 344.70         | 66.00                 | 66.00                 |
| Cedar Creek Savanna           | cedarsav.us    | US   | North America | Grassland | 45.40  | -93.18  | 682.00  | 7.50  | 116      | 842.52         | 43.00                 | 19.87                 |
| Cedar Creek Trait             | cedartrait.us  | US   | North America | Grassland | 45.40  | -93.19  | 682.00  | 7.50  | 153      | 758.95         | 43.00                 | 24.80                 |
| Los Cerrillos                 | cerrillos.ar   | AR   | South America | Shrubland | -29.95 | -65.87  | 390.00  | 21.00 | 224      | 331.82         | 50.00                 | 46.90                 |
| Chacra Experimental Patagones | chacra.ar      | AR   | South America | Shrubland | -40.72 | -62.90  | 400.00  | 14.40 | 279      | 513.73         | 50.00                 | 31.35                 |
| Changling                     | chang.cn       | CN   | Asia          | Grassland | 44.75  | 123.75  | 444.90  | 6.10  | 482      | 577.00         | 70.00                 | 62.09                 |
| Charleville                   | charleville.au | AU   | Australia     | Grassland | -26.36 | 146.15  | 451.00  | 21.00 | 387      | 164.60         | 65.00                 | 65.00                 |
| Las Chilcas                   | chilcasdrt.ar  | AR   | South America | Grassland | -36.16 | -58.16  | 950.00  | 16.00 | 368      | 823.03         | 50.00                 | 50.00                 |
| Ciempozuelos                  | ciempoz.es     | ES   | Europe        | Shrubland | 40.19  | -3.60   | 363.60  | 15.21 | 236      | 366.80         | 44.00                 | 39.83                 |
| Cobar                         | cobar.au       | AU   | Australia     | Grassland | -31.77 | 145.56  | 354.00  | 18.90 | 382      | 245.00         | 65.00                 | 65.00                 |
| Cowichan                      | cowidrt.ca     | CA   | North America | Grassland | 48.81  | -123.63 | 1134.00 | 10.21 | 253      | 1146.83        | 50.00                 | 45.63                 |
| CredoJ                        | credoj.au      | AU   | Australia     | Shrubland | -30.47 | 120.81  | 259.60  | 18.75 | 342      | 319.54         | 60.00                 | 57.29                 |
| CredoM                        | credom.au      | AU   | Australia     | Shrubland | -30.47 | 120.81  | 259.60  | 18.75 | 342      | 319.54         | 60.00                 | 57.29                 |
| GCN-Dangxiong                 | dang.cn        | CN   | Asia          | Grassland | 30.50  | 91.07   | 419.00  | 2.47  | 234      | 363.98         | 50.00                 | 38.92                 |
| EEA                           | eea.br         | BR   | South America | Grassland | -30.10 | -51.68  | 1440.00 | 19.61 | 184      | 1615.00        | 30.00                 | 18.13                 |
| EE Elva                       | elvadrt.ee     | EE   | Europe        | Grassland | 58.26  | 26.36   | 680.00  | 5.80  | 442      | 606.20         | 62.00                 | 62.00                 |
| ESW                           | esw.ca         | CA   | North America | Grassland | 43.08  | -81.34  | 1011.50 | 7.90  | 136      | 968.06         | 45.00                 | 18.77                 |

| Site name          | Site code    | Loc. | Cont.            | Eco type  | Lat    | Long    | MAP     | MAT   | Trt days | Ambient precip | Target % precip reduc | Actual % precip reduc |
|--------------------|--------------|------|------------------|-----------|--------|---------|---------|-------|----------|----------------|-----------------------|-----------------------|
| Falls Creek        | falls.au     | AU   | Australia        | Grassland | -36.88 | 147.25  | 1239.00 | 9.40  | 368      | 1338.52        | 40.00                 | 40.00                 |
| Freiburg           | freiburg.de  | DE   | Europe           | Grassland | 48.02  | 7.83    | 934.00  | 11.40 | 122      | 955.70         | 35.00                 | 17.39                 |
| Granite Cover      | gmgranite.us | US   | North<br>America | Shrubland | 34.78  | -115.65 | 220.00  | 29.28 | 364      | 226.75         | 66.00                 | 66.00                 |
| Molar Junction     | gmmolar.us   | US   | North<br>America | Shrubland | 34.78  | -115.65 | 220.00  | 29.28 | 364      | 226.75         | 66.00                 | 66.00                 |
| Guaribas           | guaribas.br  | BR   | South<br>America | Grassland | -6.74  | -35.14  | 1908.00 | 27.00 | 240      | 1072.33        | 46.00                 | 28.42                 |
| GCN-Haibei         | haibei.cn    | CN   | North<br>Asia    | Grassland | 37.61  | 101.31  | 469.00  | -0.70 | 591      | 747.31         | 50.00                 | 50.00                 |
| Hardware Ranch     | hard.us      | US   | North<br>America | Shrubland | 41.61  | -111.57 | 462.00  | 9.00  | 124      | 497.30         | 47.00                 | 12.16                 |
| HOIDE              | hoide.de     | DE   | Europe           | Shrubland | 54.55  | 13.10   | 541.15  | 8.53  | 469      | 603.00         | 40.00                 | 40.00                 |
| GCN-Hongyuan       | hong.cn      | CN   | Asia             | Grassland | 32.83  | 102.58  | 703.00  | 2.97  | 230      | 931.50         | 50.00                 | 31.04                 |
| GCN-Hulunber       | hulun.cn     | CN   | Asia             | Grassland | 49.33  | 119.95  | 360.00  | -1.83 | 235      | 348.93         | 50.00                 | 39.46                 |
| HYIDE              | hyide.de     | DE   | Europe           | Shrubland | 54.55  | 13.10   | 541.15  | 8.53  | 470      | 603.00         | 40.00                 | 40.00                 |
| Jornada LTER       | jordrt.us    | US   | North<br>America | Grassland | 32.60  | -106.83 | 241.88  | 16.10 | 355      | 172.00         | 80.00                 | 76.60                 |
| JRN Chihuahuan     | jrnchi.us    | US   | North<br>America | Shrubland | 32.55  | -106.77 | 246.60  | 18.10 | 366      | 315.98         | 70.00                 | 70.00                 |
| Kernen-burned      | kernb.ca     | CA   | North<br>America | Grassland | 52.17  | -106.53 | 353.70  | 2.60  | 449      | 414.70         | 47.50                 | 36.29                 |
| Kernen-unburned    | kernnu.ca    | CA   | North<br>America | Grassland | 52.17  | -106.53 | 353.70  | 2.60  | 449      | 414.70         | 47.50                 | 36.29                 |
| Kinsella           | kinsella.ca  | CA   | North<br>America | Grassland | 53.03  | -111.56 | 406.24  | 2.40  | 420      | 443.40         | 45.00                 | 28.23                 |
| Kiskunsag          | kiskun.hu    | HU   | Europe           | Grassland | 46.87  | 19.42   | 596.00  | 11.00 | 137      | 776.60         | 40.00                 | 18.87                 |
| Konza              | konzadrt.us  | US   | North<br>America | Grassland | 39.11  | -96.61  | 830.00  | 12.00 | 175      | 1104.20        | 60.00                 | 46.30                 |
| Lygra intermediate | lygraint.no  | NO   | Europe           | Shrubland | 60.65  | 5.09    | 2234.00 | 7.40  | 113      | 2687.90        | 50.00                 | 13.49                 |
| Lygra old          | lygraold.no  | NO   | Europe           | Shrubland | 60.65  | 5.10    | 2234.00 | 7.40  | 113      | 2687.90        | 50.00                 | 13.49                 |



| Site name           | Site code     | Loc. | Cont.         | Eco type  | Lat    | Long    | MAP     | MAT   | Trt days | Ambient precip | Target % precip reduc | Actual % precip reduc |
|---------------------|---------------|------|---------------|-----------|--------|---------|---------|-------|----------|----------------|-----------------------|-----------------------|
| Lygra young         | lygrayng.no   | NO   | Europe        | Shrubland | 60.65  | 5.09    | 2234.00 | 7.40  | 113      | 2687.90        | 50.00                 | 13.49                 |
| Mar Chiquita        | marcdrt.ar    | AR   | South America | Grassland | -37.72 | -57.42  | 927.90  | 20.70 | 143      | 1088.20        | 50.00                 | 11.87                 |
| Matador             | matador.ca    | CA   | North America | Grassland | 50.70  | -107.73 | 358.40  | 4.20  | 451      | 390.60         | 47.50                 | 35.66                 |
| Matta LTER          | matta.il      | IL   | Asia          | Shrubland | 31.71  | 35.06   | 540.00  | 17.70 | 213      | 510.84         | 66.00                 | 64.54                 |
| Mattheis            | mattheis.ca   | CA   | North America | Grassland | 50.90  | -111.88 | 329.11  | 4.09  | 377      | 330.90         | 55.00                 | 40.57                 |
| Milparinka          | milparinka.au | AU   | Australia     | Grassland | -29.61 | 141.71  | 192.00  | 20.40 | 385      | 228.20         | 65.00                 | 65.00                 |
| Monte Oriental      | morient.ar    | AR   | South America | Shrubland | -39.68 | -64.85  | 382.70  | 14.10 | 349      | 464.13         | 47.00                 | 46.27                 |
| Naposta             | naposta.ar    | AR   | South America | Grassland | -38.42 | -62.29  | 553.00  | 15.00 | 365      | 645.70         | 44.00                 | 44.00                 |
| GCN-Naqu            | naqu.cn       | CN   | Asia          | Grassland | 31.64  | 92.01   | 430.00  | -1.45 | 226      | 495.46         | 50.00                 | 31.30                 |
| NNSS Mojave         | nnss.us       | US   | North America | Shrubland | 36.83  | -116.02 | 132.80  | 19.80 | 347      | 167.13         | 60.00                 | 58.27                 |
| North Platte        | nplatte.us    | US   | North America | Shrubland | 42.71  | -106.57 | 305.00  | 8.00  | 124      | 288.20         | 63.00                 | 42.15                 |
| Nyngan              | nyngan.au     | AU   | Australia     | Grassland | -31.64 | 146.65  | 441.00  | 18.70 | 382      | 219.60         | 65.00                 | 65.00                 |
| OCTC GreatBasin     | octc.us       | US   | North America | Shrubland | 43.25  | -116.22 | 297.90  | 10.30 | 377      | 284.99         | 40.00                 | 40.00                 |
| Oklahoma (KAEFS-OK) | oklah.us      | US   | North America | Grassland | 34.98  | -97.53  | 880.00  | 16.36 | 153      | 1069.59        | 42.63                 | 22.49                 |
| ORE IDE AA          | oreaa.us      | US   | North America | Shrubland | 42.18  | -121.02 | 497.00  | 7.10  | 384      | 465.16         | 41.00                 | 41.00                 |
| ORE IDE AC          | oreac.us      | US   | North America | Shrubland | 42.18  | -121.02 | 497.00  | 7.10  | 382      | 465.16         | 41.00                 | 41.00                 |
| Potrok Aike         | paike.ar      | AR   | South America | Grassland | -51.92 | -70.41  | 202.00  | 5.00  | 469      | 205.92         | 54.00                 | 54.00                 |
| Passo Gavia         | passogavia.it | IT   | Europe        | Grassland | 46.35  | 10.49   | 1281.00 | -2.10 | 438      | 827.95         | 43.00                 | 19.66                 |
| Pineta              | pineta.es     | ES   | Europe        | Grassland | 42.66  | 0.12    | 1356.60 | 7.30  | 214      | 763.50         | 32.82                 | 18.14                 |

| Site name                                       | Site code    | Loc. | Cont.         | Eco type  | Lat    | Long    | MAP     | MAT   | Trt days | Ambient precip | Target % precip reduc | Actual % precip reduc |
|-------------------------------------------------|--------------|------|---------------|-----------|--------|---------|---------|-------|----------|----------------|-----------------------|-----------------------|
| University of Wisconsin-Platteville Greenhouses | plattev.us   | US   | North America | Grassland | 42.73  | -90.49  | 961.60  | 8.10  | 518      | 1042.10        | 50.00                 | 50.00                 |
| PNE IDE- burned                                 | pneburn.br   | BR   | South America | Grassland | -17.92 | -52.99  | 1568.26 | 24.60 | 301      | 1284.69        | 30.00                 | 25.03                 |
| PNE IDE-unburned                                | pneunburn.br | BR   | South America | Grassland | -17.92 | -52.99  | 1568.26 | 24.60 | 301      | 1284.69        | 30.00                 | 25.03                 |
| Los Pozos                                       | pozos.ar     | AR   | South America | Grassland | -51.39 | -69.25  | 244.00  | 7.50  | 386      | 281.00         | 50.00                 | 50.00                 |
| Purdue Wildlife Area                            | purdue.us    | US   | North America | Grassland | 40.45  | -87.05  | 950.00  | 11.10 | 119      | 1067.56        | 40.00                 | 16.11                 |
| Quilpie                                         | quilpie.au   | AU   | Australia     | Grassland | -26.58 | 144.62  | 354.00  | 22.00 | 386      | 134.60         | 65.00                 | 65.00                 |
| Rhijnauwen                                      | rhijn.nl     | NL   | Europe        | Grassland | 52.07  | 5.18    | 796.92  | 9.50  | 462      | 656.40         | 51.40                 | 51.40                 |
| Rio Mayo                                        | riomayo.ar   | AR   | South America | Shrubland | -45.40 | -70.31  | 155.00  | 9.50  | 358      | 118.85         | 67.00                 | 66.33                 |
| San Claudio                                     | sclaudio.ar  | AR   | South America | Grassland | -35.92 | -61.15  | 950.00  | 16.00 | 176      | 1016.41        | 50.00                 | 18.59                 |
| Santa Cruz High                                 | scruz.h.us   | US   | North America | Grassland | 37.02  | -122.08 | 745.00  | 13.90 | 156      | 1148.70        | 60.00                 | 54.98                 |
| Santa Cruz Low                                  | scruz.l.us   | US   | North America | Grassland | 36.95  | -122.06 | 745.00  | 13.90 | 154      | 825.90         | 60.00                 | 51.30                 |
| Santa Cruz Middle                               | scruz.m.us   | US   | North America | Grassland | 36.95  | -122.06 | 745.00  | 13.90 | 163      | 999.96         | 60.00                 | 54.20                 |
| Sedgwick Reserve                                | sedgwick.us  | US   | North America | Grassland | 34.72  | -120.04 | 380.00  | 15.00 | 116      | 304.00         | 75.00                 | 56.05                 |
| Sevilleta Black                                 | sevblack.us  | US   | North America | Grassland | 34.34  | -106.69 | 249.00  | 14.00 | 360      | 245.00         | 66.00                 | 65.34                 |
| Sevilleta Blue                                  | sevblue.us   | US   | North America | Grassland | 34.34  | -106.62 | 255.00  | 15.00 | 365      | 229.60         | 66.00                 | 66.00                 |
| Sevilleta Mixed                                 | sevmixed.us  | US   | North America | Grassland | 34.36  | -106.69 | 234.00  | 14.00 | 365      | 227.08         | 66.00                 | 66.00                 |

| Site name                        | Site code      | Loc. | Cont.         | Eco type  | Lat    | Long    | MAP     | MAT   | Trt days | Ambient precip | Target % precip reduc | Actual % precip reduc |
|----------------------------------|----------------|------|---------------|-----------|--------|---------|---------|-------|----------|----------------|-----------------------|-----------------------|
| Shortgrass Steppe                | sgsdrt.us      | US   | North America | Grassland | 40.81  | -104.71 | 341.00  | 8.60  | 439      | 319.30         | 66.00                 | 66.00                 |
| Skotsvaer                        | skotsvar.no    | NO   | Europe        | Shrubland | 65.80  | 12.22   | 1766.00 | 5.50  | 466      | 998.20         | 60.00                 | 60.00                 |
| SLP                              | slp.us         | US   | North America | Grassland | 30.08  | -97.17  | 930.70  | 20.11 | 334      | 888.49         | 50.00                 | 46.80                 |
| Sonora Agrilife Research Station | sonora.us      | US   | North America | Grassland | 30.27  | -100.56 | 567.90  | 17.94 | 246      | 565.15         | 69.00                 | 62.43                 |
| San Pablo Valdes                 | spvdr.ar       | AR   | South America | Grassland | -42.65 | -64.17  | 220.60  | 20.70 | 135      | 247.09         | 50.00                 | 24.77                 |
| Syferkuil (Drought Act Limpopo)  | syferkuil.za   | ZA   | Africa        | Grassland | -23.85 | 29.70   | 478.00  | 17.10 | 217      | 421.51         | 66.00                 | 42.07                 |
| Torla                            | torla.es       | ES   | Europe        | Grassland | 42.65  | -0.07   | 1405.36 | 7.40  | 195      | 1759.93        | 19.55                 | 11.29                 |
| Ukulinga IDE                     | ukulingadrt.za | ZA   | Africa        | Grassland | -29.67 | 30.40   | 732.60  | 18.60 | 210      | 644.60         | 50.00                 | 43.75                 |
| GCN-Urat                         | urat.cn        | CN   | Asia          | Grassland | 41.42  | 106.97  | 152.00  | 4.83  | 237      | 196.85         | 50.00                 | 43.87                 |
| Validate                         | validate.fr    | FR   | Europe        | Grassland | 45.72  | 3.02    | 790.00  | 8.19  | 474      | 707.40         | 68.00                 | 68.00                 |
| Wytham Rain Drop                 | wytham.uk      | UK   | Europe        | Grassland | 51.77  | -1.33   | 743.60  | 9.93  | 335      | 591.49         | 50.00                 | 19.21                 |
| GCN-Xilinhot                     | xilin.cn       | CN   | Asia          | Grassland | 43.55  | 116.74  | 338.00  | 1.08  | 242      | 295.00         | 50.00                 | 42.47                 |
| GCN-Yanchi                       | yanchi.cn      | CN   | Asia          | Grassland | 37.31  | 106.93  | 337.00  | 8.06  | 227      | 460.51         | 50.00                 | 40.56                 |
| Yarramundi                       | yarradrt.au    | AU   | Australia     | Grassland | -33.61 | 150.74  | 800.00  | 17.60 | 274      | 1131.00        | 65.00                 | 41.57                 |
| GCN-Youyu                        | youyu.cn       | CN   | Asia          | Grassland | 39.99  | 112.32  | 390.00  | 4.63  | 235      | 552.64         | 50.00                 | 39.39                 |

**Table S3.** Results from one-sided t-tests examining whether nominal or extreme droughts reduced ANPP of grasslands, shrublands, or both. Mean drought response by overall level of drought extremeness (extreme or nominal) and drought extremeness by ecosystem types (grassland or shrubland) were significantly less than 0 (no difference in ANPP between drought and control plots). The table includes model estimates (Est.), degrees of freedom (df), t-value (t), and p-value (p). Drought response is defined as  $\ln(\text{average ANPP}_{\text{DROUGHT}}/\text{average ANPP}_{\text{CONTROL}})$ .

|                            | Est.  | df | t     | p      |
|----------------------------|-------|----|-------|--------|
| All sites, extreme (n= 44) | -0.42 | 43 | -6.31 | <0.001 |
| All sites, nominal (n= 56) | -0.23 | 55 | -3.43 | <0.001 |
| Grassland, extreme (n= 35) | -0.47 | 34 | -5.93 | <0.001 |
| Grassland, nominal (n= 39) | -0.24 | 38 | -3.13 | 0.002  |
| Shrubland, extreme (n= 9)  | -0.23 | 8  | -2.75 | 0.01   |
| Shrubland, nominal (n= 17) | -0.22 | 16 | -1.52 | 0.07   |

**Table S4.** Linear mixed-effects model results (site set as a random effect) testing the effects of ecosystem type (grassland or shrubland) on drought response for all sites (n= 100). The table includes the intercept (slope for grassland), predictor variable (Shrubland), model estimates (Est., slope for shrubland), standard error (SE), degrees of freedom (df), t-value (t), p-value (Pr(>|t|)), and adjusted R<sup>2</sup> (R<sup>2</sup>). Drought response is defined as  $\ln(\text{average ANPP}_{\text{DROUGHT}}/\text{average ANPP}_{\text{CONTROL}})$ .

|           | Est.  | SE   | df | t     | Pr(> t ) | R <sup>2</sup> |
|-----------|-------|------|----|-------|----------|----------------|
| Intercept | -0.35 | 0.06 | 98 | -6.10 | <0.001   | 0.003          |
| Shrubland | 0.13  | 0.11 |    | 1.05  | 0.25     |                |

**Table S5.** Site codes (refer to Table S2 for full site names) and information for each site on drought response (Drt resp), drought severity (Drt sev), previous year's precipitation (Prev year's precip, the precipitation in the 365-730 days preceding the biomass harvest), interannual % coefficient of variation in MAP (CV), natural log of the aridity index (ln(AI)), average percent sand (Sand), average proportion of graminoids (Gram), and the average plot-level richness (Ave rich). For sites with -- in a column, this datum was unavailable. \*Previous year's precipitation was relativized by MAP.

| Site code      | Drt resp | Drt sev | Prev year's precip* | CV    | ln(AI) | Sand  | Gram | Ave rich |
|----------------|----------|---------|---------------------|-------|--------|-------|------|----------|
| allmendb.ch    | -0.03    | -0.13   | 977.20              | 11.84 | 0.17   | 42.13 | 0.65 | 28.27    |
| allmendo.ch    | 0.32     | -0.14   | 977.20              | 11.84 | 0.17   | 42.13 | 0.70 | 24.80    |
| antelope.us    | -0.49    | 0.11    | 310.33              | 26.82 | -1.61  | 53.92 | 0.83 | 3.87     |
| ayora.es       | 0.43     | -0.60   | 309.20              | 18.37 | -0.71  | 40.79 | --   | 14.10    |
| baddrt.de      | -0.18    | -0.44   | 372.80              | 19.75 | -0.41  | 40.79 | 0.14 | 7.22     |
| bange.cn       | 0.14     | -0.30   | 353.24              | 21.96 | -0.81  | 63.21 | 0.39 | --       |
| baydrdt.de     | -0.25    | -0.42   | 518.04              | 15.29 | -0.17  | 41.53 | 0.65 | 6.56     |
| bfl.us         | -0.06    | -0.46   | 1210.10             | 29.57 | -0.60  | 32.54 | --   | 10.92    |
| biddulph.ca    | -0.76    | -0.25   | 443.30              | 25.11 | -0.79  | 46.42 | --   | 6.06     |
| bldrdrdt.us    | -0.43    | -0.40   | 487.43              | 21.95 | -0.95  | 36.50 | --   | --       |
| brokenh.au     | -1.67    | -0.85   | 362.00              | 52.57 | -1.67  | 59.35 | 0.26 | 3.88     |
| brookdale.ca   | -0.01    | -0.50   | 540.16              | 19.80 | -0.50  | 28.45 | 0.47 | 9.50     |
| capmcd.us      | 0.08     | -0.56   | 310.70              | 33.59 | -1.68  | 45.43 | 0.31 | 5.57     |
| capwhite.us    | -1.44    | -0.43   | 265.80              | 36.41 | -2.03  | 57.04 | 0.52 | 7.64     |
| cedarsav.us    | -0.34    | -0.01   | 847.09              | 15.18 | -0.17  | 75.37 | 0.75 | 11.50    |
| cedartrait.us  | -0.45    | -0.16   | 888.24              | 18.19 | -0.18  | 76.98 | 0.43 | 10.48    |
| cerrillos.ar   | -0.58    | -0.55   | 545.16              | 20.61 | -1.40  | 66.28 | 0.62 | 11.67    |
| chacra.ar      | -0.11    | -0.12   | 442.60              | 21.92 | -1.27  | 60.09 | 1.00 | 5.85     |
| chang.cn       | -0.83    | -0.51   | 504.17              | 31.89 | -0.69  | 52.92 | 0.89 | 4.42     |
| charleville.au | -0.23    | -0.87   | 656.74              | 45.82 | -1.24  | 54.82 | 0.02 | 2.25     |
| chilcadrtd.ar  | -0.31    | -0.57   | 946.45              | 27.33 | -0.31  | 35.84 | 0.98 | 8.00     |
| ciempoz.es     | 0.21     | -0.39   | 333.60              | 21.68 | -0.98  | 37.60 | 0.00 | 2.69     |
| cobar.au       | -0.85    | -0.76   | 533.00              | 36.70 | -1.41  | 52.19 | 0.24 | 6.00     |
| cowidrt.ca     | -0.37    | -0.45   | 1054.28             | 16.83 | 0.44   | 37.59 | 0.63 | 19.56    |
| credoj.au      | -0.45    | -0.47   | 269.42              | 27.46 | -1.76  | 61.94 | 0.19 | 9.20     |
| credom.au      | -0.31    | -0.47   | 269.42              | 27.46 | -1.76  | 61.94 | 0.12 | 9.24     |
| dang.cn        | 0.08     | -0.47   | 493.21              | 17.76 | -0.91  | 51.74 | 0.73 | --       |
| eea.br         | -0.12    | -0.08   | 1836.60             | 19.32 | 0.06   | 31.54 | --   | 26.80    |

| Site code     | Drt resp | Drt sev | Prev year's precip* | CV    | ln(AI) | Sand  | Gram | Ave rich |
|---------------|----------|---------|---------------------|-------|--------|-------|------|----------|
| elvadrt.ee    | -0.35    | -0.66   | 740.00              | 17.48 | 0.09   | 49.25 | 0.54 | 22.24    |
| esw.ca        | -0.23    | -0.22   | 807.81              | 13.21 | 0.09   | 23.69 | 0.09 | 8.94     |
| falls.au      | 0.05     | -0.35   | 1719.33             | 24.91 | 0.69   | 59.48 | 0.37 | 11.61    |
| freiburg.de   | -0.27    | -0.15   | 1064.10             | 16.03 | 0.03   | 29.98 | 0.63 | --       |
| gmgranite.us  | 0.38     | -0.65   | 259.08              | 45.21 | -1.73  | 63.76 | 0.35 | 6.86     |
| gmmolar.us    | 0.31     | -0.65   | 259.08              | 45.21 | -1.76  | 63.95 | 0.26 | 12.14    |
| guaribas.br   | -0.68    | -0.60   | 1090.05             | 19.25 | -0.21  | 53.31 | 0.80 | 7.08     |
| haibei.cn     | -0.26    | -0.20   | 695.83              | 9.49  | -0.41  | 41.31 | 0.00 | --       |
| hard.us       | 0.11     | -0.05   | 545.30              | 19.24 | -0.87  | 27.38 | 0.27 | 7.61     |
| hoide.de      | -0.62    | -0.33   | 614.70              | 16.16 | -0.08  | 45.16 | --   | --       |
| hong.cn       | -0.03    | -0.09   | 586.10              | 13.62 | -0.15  | 40.04 | 0.42 | --       |
| hulun.cn      | -0.55    | -0.41   | 315.26              | 20.25 | -0.68  | 22.70 | 0.46 | --       |
| hyide.de      | -1.21    | -0.33   | 614.70              | 16.16 | -0.08  | 47.79 | --   | --       |
| jorndrt.us    | -0.11    | -0.83   | 283.60              | 31.74 | -1.81  | 70.69 | 0.81 | 4.11     |
| jrncchi.us    | -0.07    | -0.62   | 245.36              | 32.12 | -1.83  | 69.82 | --   | 4.10     |
| kernb.ca      | -0.03    | -0.25   | 488.50              | 30.82 | -0.75  | 50.52 | 0.76 | 14.00    |
| kernnu.ca     | 0.25     | -0.25   | 488.50              | 30.82 | -0.75  | 49.88 | 0.74 | 11.78    |
| kinsella.ca   | -0.28    | -0.22   | 487.70              | 23.13 | -0.52  | 38.01 | --   | 2.48     |
| kiskun.hu     | -0.09    | 0.06    | 528.60              | 22.30 | -0.53  | 79.25 | --   | 11.73    |
| konzadrt.us   | -0.17    | -0.29   | 965.85              | 18.77 | -0.31  | 8.63  | 0.79 | 8.31     |
| lygraint.no   | 0.58     | 0.04    | 2713.80             | 15.57 | 1.53   | 56.96 | 0.31 | --       |
| lygraold.no   | -0.31    | 0.04    | 2713.80             | 15.57 | 1.53   | 56.70 | 0.39 | --       |
| lygrayng.no   | 0.37     | 0.04    | 2713.80             | 15.57 | 1.53   | 57.64 | 0.08 | --       |
| marcdrt.ar    | -0.10    | 0.03    | 690.50              | 22.10 | -0.29  | --    | 0.97 | 8.52     |
| matador.ca    | -0.25    | -0.30   | 646.20              | 27.18 | -0.86  | 23.37 | 0.90 | 10.50    |
| matta.il      | -0.48    | -0.66   | 654.56              | 33.70 | -1.07  | 24.67 | 0.26 | --       |
| mattheis.ca   | -0.12    | -0.40   | 440.40              | 24.26 | -0.97  | 41.76 | --   | 3.97     |
| milparinka.au | 0.00     | -0.58   | 333.20              | 58.47 | -2.01  | 55.71 | 0.62 | 5.83     |
| morient.ar    | -0.64    | -0.35   | 334.97              | 31.10 | -1.59  | 66.31 | 0.77 | --       |
| naposta.ar    | -1.95    | -0.35   | 558.09              | 24.64 | -0.66  | 35.31 | --   | 6.07     |
| naqu.cn       | -0.22    | -0.21   | 488.58              | 27.44 | -0.56  | 63.54 | 0.69 | --       |
| nnss.us       | -0.79    | -0.47   | 216.15              | 43.98 | -2.38  | 57.66 | --   | 17.45    |
| nplatte.us    | 0.00     | -0.45   | 413.70              | 21.16 | -1.37  | 33.25 | 0.98 | 5.28     |
| nyngan.au     | -0.53    | -0.83   | 654.79              | 37.94 | -1.19  | 50.71 | 0.27 | --       |
| octc.us       | -0.19    | -0.43   | 316.74              | 25.95 | -1.40  | 33.27 | --   | 3.35     |
| oklah.us      | -0.23    | -0.06   | 1401.32             | 28.18 | -0.42  | 31.05 | --   | 14.67    |
| oreaa.us      | -0.33    | -0.45   | 438.39              | 21.59 | -0.89  | 44.76 | --   | 11.85    |
| oreac.us      | -0.32    | -0.45   | 438.39              | 21.59 | -0.89  | 44.76 | --   | 11.92    |
| paike.ar      | -0.31    | -0.53   | 155.56              | 24.01 | -1.23  | 72.71 | 0.84 | 17.61    |
| passogavia.it | 0.06     | -0.48   | 755.51              | 18.21 | 1.33   | 42.11 | 0.53 | 14.92    |
| pineta.es     | -0.46    | -0.54   | 964.40              | 18.18 | 0.27   | 34.95 | 0.95 | 8.75     |

| Site code      | Drt resp | Drt sev | Prev year's precip* | CV    | ln(AI) | Sand  | Gram | Ave rich |
|----------------|----------|---------|---------------------|-------|--------|-------|------|----------|
| plattev.us     | -0.93    | -0.46   | 1119.30             | 16.63 | -0.11  | 10.88 | 0.57 | --       |
| pneburn.br     | -0.05    | -0.39   | 1489.46             | 16.19 | 0.00   | 41.72 | 0.72 | --       |
| pneunburn.br   | -1.27    | -0.39   | 1489.46             | 16.19 | 0.00   | 42.41 | 0.49 | --       |
| pozos.ar       | 0.66     | -0.42   | 287.68              | 18.37 | -1.25  | 64.03 | 0.30 | --       |
| purdue.us      | -0.38    | -0.06   | 973.13              | 12.34 | -0.09  | 18.37 | --   | 4.42     |
| quilpie.au     | -0.57    | -0.87   | 473.32              | 52.05 | -1.55  | 48.64 | 0.17 | 4.06     |
| rhijn.nl       | -0.27    | -0.60   | 952.30              | 11.94 | 0.15   | 36.91 | 0.79 | 15.33    |
| riomayo.ar     | -0.35    | -0.74   | 142.68              | 24.82 | -1.53  | 66.79 | 0.88 | --       |
| sclaudio.ar    | -0.47    | -0.13   | 951.86              | 25.24 | -0.32  | 55.28 | 1.00 | 2.77     |
| scruzh.us      | 0.19     | -0.31   | 845.75              | 39.42 | -0.21  | 51.33 | --   | 10.30    |
| scruzl.us      | 0.02     | -0.46   | 574.70              | 36.97 | -0.44  | --    | --   | 8.17     |
| scruzm.us      | -0.30    | -0.39   | 757.70              | 36.97 | -0.44  | --    | --   | 7.53     |
| sedgwick.us    | -0.49    | -0.65   | 216.30              | 40.45 | -0.92  | 32.42 | 0.84 | --       |
| sevblack.us    | -1.08    | -0.66   | 187.66              | 23.05 | -1.73  | 49.69 | 0.50 | 3.86     |
| sevblue.us     | -0.24    | -0.69   | 186.10              | 23.05 | -1.64  | 43.21 | 0.97 | 2.71     |
| sevmixed.us    | -0.78    | -0.67   | 201.74              | 23.05 | -1.77  | 47.63 | 0.76 | 4.29     |
| sgsdrdt.us     | -2.12    | -0.68   | 298.70              | 19.06 | -1.14  | 44.86 | 0.82 | --       |
| skotsvar.no    | -0.03    | -0.77   | 2347.10             | 17.55 | 1.59   | --    | 0.03 | --       |
| slp.us         | -0.29    | -0.49   | 1331.90             | 28.32 | -0.47  | 60.95 | --   | 12.42    |
| sonora.us      | -0.49    | -0.63   | 495.05              | 32.49 | -1.00  | 12.99 | 0.51 | --       |
| spvdrdt.ar     | 0.22     | -0.16   | 150.59              | 15.28 | -1.58  | 64.04 | 0.76 | 11.86    |
| syferkuil.za   | -0.19    | -0.49   | 584.23              | 28.43 | -0.48  | 54.20 | 0.96 | --       |
| torla.es       | 0.19     | 0.11    | 913.80              | 16.51 | 0.51   | 33.08 | 0.30 | --       |
| ukulingadrt.za | -0.17    | -0.51   | 693.60              | 10.09 | -0.45  | 22.84 | 0.93 | 12.93    |
| urat.cn        | -1.61    | -0.27   | 152.76              | 39.47 | -1.81  | 46.30 | 0.49 | --       |
| validate.fr    | -0.47    | -0.71   | 767.00              | 16.29 | -0.01  | 44.82 | --   | 6.50     |
| wytham.uk      | -0.76    | -0.36   | 758.10              | 17.54 | -0.04  | 24.93 | 0.61 | --       |
| xilin.cn       | -0.40    | -0.50   | 367.40              | 50.34 | -0.78  | 51.99 | 0.85 | --       |
| yanchi.cn      | -0.24    | -0.19   | 314.70              | 19.42 | -1.15  | 53.13 | 0.34 | --       |
| yarradrt.au    | -0.03    | -0.17   | 795.20              | 21.70 | -0.41  | 57.02 | 0.96 | 5.79     |
| youyu.cn       | 0.12     | -0.14   | 526.75              | 19.04 | -0.77  | 57.23 | 0.75 | --       |



**Table S6.** Linear regression results for separate models testing the effects of drought severity (Drt sev), mean annual precipitation (MAP), previous-year's precipitation (Prev yr), percent CV of MAP (CV), aridity (ln(AI)), percent sand (Sand), average proportion of graminoids (Gram), and average richness (Rich) on drought response, defined as  $\ln(\text{average ANPP}_{\text{DROUGHT}}/\text{average ANPP}_{\text{CONTROL}})$ . The table includes the intercept (int), predictor variables, model estimates (Est.), standard error (SE), degrees of freedom (df), t-value (t), p-value (p), and adjusted R<sup>2</sup> (R<sup>2</sup>). For each variable, sample size (n)= 100 and degrees of freedom (df)= 98, except where noted.

\*\*Indicates strong evidence at the  $\alpha= 0.05$  level; \*Indicates moderate evidence at the  $\alpha= 0.05$  level.

|                | Est.     | SE       | t     | p        | R <sup>2</sup> |
|----------------|----------|----------|-------|----------|----------------|
| Int            | -0.11    | 0.09     | -1.18 | 0.24     | 0.05           |
| Drt. Sev**     | 0.53     | 0.20     | 2.65  | 0.009    |                |
| Int            | -0.43    | 0.08     | -5.25 | 8.72E-07 | 0.02           |
| MAP            | 1.80E-04 | 1.03E-04 | 1.75  | 0.08     |                |
| Int            | -0.33    | 0.05     | -6.53 | 2.99E-09 | -0.002         |
| Prev Yr Precip | 0.18     | 0.20     | 0.91  | 0.37     |                |
| Int            | -0.13    | 0.13     | -1.04 | 0.30     | 0.01           |
| CV             | -0.01    | 4.78E-03 | -1.54 | 0.13     |                |
| Int            | -0.22    | 0.06     | -3.66 | 4.11E-04 | 0.05           |
| logAI**        | 0.14     | 0.06     | 2.44  | 0.02     |                |
| Int            | -0.46    | 0.17     | -2.78 | 0.01     | -0.003         |
| Sand           | 0.00     | 3.39E-03 | 0.86  | 0.39     |                |
| Int            | -0.20    | 0.12     | -1.61 | 0.11     | -0.002         |
| Prop Gram      | -0.18    | 0.19     | -0.93 | 0.35     |                |
| Int            | -0.46    | 0.10     | -4.64 | 1.69E-05 | 0.05           |
| Richness*      | 0.02     | 0.01     | 2.09  | 0.04     |                |

<sup>i</sup> Sand: n= 96, df= 94

<sup>ii</sup> Graminoids: n= 77, df= 75

<sup>iii</sup> Richness: n= 68, df= 66

**Table S7.** Linear mixed effects model results (site set as a random effect) testing the additive and interactive effects of mean annual precipitation (MAP) and percent sand (Sand) on drought response for all sites (n= 96, df= 92). The table includes the intercept, predictor variables, model estimates (Est.), standard error (SE), t-value (t), and p-value (p), and adjusted R<sup>2</sup> (R<sup>2</sup>). Drought response is defined as  $\ln(\text{average ANPP}_{\text{DROUGHT}}/\text{average ANPP}_{\text{CONTROL}})$ .

|           | Est      | SE       | t     | p    | R <sup>2</sup> |
|-----------|----------|----------|-------|------|----------------|
| Intercept | -0.61    | 0.39     | -1.55 | 0.12 | 0.01           |
| MAP       | 1.58E-04 | 5.25E-04 | 0.30  | 0.76 |                |
| Sand      | 3.54E-03 | 7.39E-03 | 0.48  | 0.63 |                |
| MAP*Sand  | 7.17E-07 | 1.01E-05 | 0.07  | 0.94 |                |

**Table S8.** Linear mixed effects model results (site set as a random effect) testing the additive effects of drought severity (Drt sev), mean annual precipitation (MAP), previous year's precipitation as relativized by MAP (Prev Yr Precip), percent CV of MAP (CV), percent sand (Sand), and graminoid abundance (Gram) on drought response for all sites (n= 74, df= 68). The table includes the intercept, predictor variables, model estimates (Est.), standard error (SE), degrees of freedom (df), t-value (t), p-value (p), and adjusted R<sup>2</sup> (R<sup>2</sup>). Drought response is defined as  $\ln(\text{average ANPP}_{\text{DROUGHT}}/\text{average ANPP}_{\text{CONTROL}})$ . \*Indicates weak evidence at the  $\alpha= 0.05$  level.

|                | Est.      | SE       | t     | p    | R <sup>2</sup> |
|----------------|-----------|----------|-------|------|----------------|
| Intercept      | 0.03      | 0.30     | 0.11  | 0.91 | 0.10           |
| Drt sev*       | 0.50      | 0.28     | 1.79  | 0.08 |                |
| MAP            | 1.86E-05  | 1.28E-04 | 0.15  | 0.88 |                |
| Prev Yr Precip | 0.34      | 0.25     | 1.34  | 0.19 |                |
| Prop gram      | -0.17     | 0.20     | -0.85 | 0.40 |                |
| Pct CV         | -7.80E-03 | 7.20E-03 | -1.08 | 0.28 |                |
| Pct sand       | 2.68E-03  | 3.77E-03 | 0.71  | 0.48 |                |

**Table S9.** The number of sites excluded from our analyses based on each of six criteria for inclusion (n=100). There are 141 sites in the network, of which 100 were used for analyses presented here.

| Criteria                                                                                | Number of sites |
|-----------------------------------------------------------------------------------------|-----------------|
| Forest or forest understory                                                             | 16              |
| Drought shelters were not in place for 120-650 days (+/- one week)                      | 5               |
| Did not submit or report aboveground net primary production                             | 10              |
| Average aboveground net primary production outside range for biome                      | 3               |
| Did not reduce precipitation in drought plots by at least 15% compared to control plots | 4               |
| Did not follow IDE protocols                                                            | 3               |

**Table S10.** Disturbance and management history for each site (refer to Table S2 for full site names). For each experimental location, site coordinators reported disturbances or management at their site, with 1 indicating a disturbance/management practice generally within three decades before establishment of the experiment and 0 indicating no disturbance/management practice. The plowing history column refers to mechanical disturbances that break up the soil surface such as agricultural practices. The fire history column refers to disturbance events of both natural and prescribed fire. The grazing history column refers to the presence of both natural and domesticated grazing animals. The mowing history column refers to a removal of aboveground biomass by mechanical means. Of the 100 sites that provided disturbance or management history, we know of 13 that continue to be actively mowed (n=6), burned (n=5), or experience occasional grazing (n=2). \*Indicates that the activity occurred during the experiment.

| Site code     | Plowing history | Grazing history | Burning history | Mowing history | Historically managed | Actively managed |
|---------------|-----------------|-----------------|-----------------|----------------|----------------------|------------------|
| allmendb.ch   | 0               | 0               | 0               | 1*             | 1                    | 1                |
| allmendo.ch   | 0               | 0               | 0               | 1*             | 1                    | 1                |
| antelope.us   | 0               | 1               | 0               | 0              | 1                    | 0                |
| ayora.es      | 0               | 0               | 1               | 0              | 0                    | 0                |
| baddrt.de     | 0               | 0               | 0               | 1*             | 1                    | 1                |
| bange.cn      | 0               | 0               | 0               | 0              | 0                    | 0                |
| bayrdrt.de    | 0               | 0               | 0               | 1*             | 0                    | 1                |
| bfl.us        | 0               | 1               | 1               | 1              | 0                    | 0                |
| biddulph.ca   | 0               | 0               | 0               | 0              | 0                    | 0                |
| blrdrt.us     | 0               | 1               | 0               | 0              | 0                    | 0                |
| brokenh.au    | 0               | 1               | 0               | 0              | 1                    | 0                |
| brookdale.ca  | 0               | 0               | 0               | 0              | 0                    | 0                |
| capmcd.us     | 0               | 0               | 0               | 0              | 0                    | 0                |
| capwhite.us   | 0               | 0               | 0               | 0              | 0                    | 0                |
| cedarsav.us   | 0               | 0               | 1*              | 0              | 1                    | 1                |
| cedartrait.us | 1               | 0               | 1*              | 0              | 1                    | 1                |
| cerrillos.ar  | 0               | 1               | 0               | 0              | 1                    | 0                |
| chacra.ar     | 0               | 0               | 0               | 0              | 0                    | 0                |

| Site code      | Plowing history | Grazing history | Burning history | Mowing history | Historically managed | Actively managed |
|----------------|-----------------|-----------------|-----------------|----------------|----------------------|------------------|
| chang.cn       | 0               | 0               | 0               | 0              | 0                    | 0                |
| charleville.au | 0               | 1               | 0               | 0              | 1                    | 0                |
| chilcadr.ar    | 0               | 1               | 0               | 0              | 0                    | 0                |
| ciempoz.es     | 0               | 0               | 0               | 0              | 0                    | 0                |
| cobar.au       | 0               | 1               | 0               | 0              | 1                    | 0                |
| cowidrt.ca     | 0               | 0               | 0               | 0              | 0                    | 0                |
| credoj.au      | 0               | 1               | 0               | 0              | 0                    | 0                |
| credom.au      | 0               | 1               | 0               | 0              | 0                    | 0                |
| dang.cn        | 0               | 0               | 0               | 0              | 0                    | 0                |
| eea.br         | 0               | 0               | 0               | 0              | 1                    | 0                |
| elvadr.ee      | 1               | 0               | 0               | 1*             | 1                    | 1                |
| esw.ca         | 1               | 0               | 0               | 0              | 0                    | 0                |
| falls.au       | 0               | 0               | 0               | 0              | 0                    | 0                |
| freiburg.de    | 0               | 1               | 0               | 1*             | 1                    | 1                |
| gmgranite.us   | 0               | 0               | 0               | 0              | 0                    | 0                |
| gmmolar.us     | 0               | 0               | 0               | 0              | 0                    | 0                |
| guaribas.br    | 0               | 0               | 1               | 0              | 1                    | 0                |
| haibei.cn      | 0               | 0               | 0               | 0              | 0                    | 0                |
| hard.us        | 0               | 1               | 0               | 0              | 0                    | 0                |
| hoide.de       | 0               | 0               | 0               | 0              | 1                    | 0                |
| hong.cn        | 0               | 0               | 0               | 0              | 0                    | 0                |
| hulun.cn       | 0               | 0               | 0               | 0              | 0                    | 0                |
| hyide.de       | 0               | 0               | 0               | 0              | 1                    | 0                |
| jordrt.us      | 0               | 0               | 0               | 0              | 0                    | 0                |
| jrnchi.us      | 0               | 1*              | 0               | 0              | 0                    | 1                |
| kernb.ca       | 0               | 1               | 1*              | 0              | 1                    | 1                |
| kernnu.ca      | 0               | 1               | 0               | 0              | 1                    | 0                |
| kinsella.ca    | 0               | 1               | 0               | 0              | 0                    | 0                |
| kiskun.hu      | 0               | 1               | 0               | 0              | 0                    | 0                |
| konzadr.us     | 0               | 0               | 1*              | 0              | 0                    | 1                |
| lygraint.no    | 0               | 1               | 1               | 0              | 1                    | 0                |
| lygraold.no    | 0               | 1               | 1               | 0              | 1                    | 0                |
| lygrayng.no    | 0               | 1               | 1               | 0              | 1                    | 0                |
| marcdr.ar      | 0               | 0               | 0               | 0              | 0                    | 0                |
| matador.ca     | 0               | 0               | 0               | 0              | 0                    | 0                |
| matta.il       | 0               | 1               | 0               | 0              | 0                    | 0                |
| mattheis.ca    | 0               | 1               | 0               | 0              | 0                    | 0                |
| milparinka.au  | 0               | 1               | 0               | 0              | 1                    | 0                |
| morient.ar     | 0               | 1               | 0               | 0              | 1                    | 0                |
| naposta.ar     | 0               | 0               | 0               | 0              | 0                    | 0                |
| naqu.cn        | 0               | 0               | 0               | 0              | 0                    | 0                |

| Site code       | Plowing history | Grazing history | Burning history | Mowing history | Historically managed | Actively managed |
|-----------------|-----------------|-----------------|-----------------|----------------|----------------------|------------------|
| nnss.us         | 0               | 0               | 0               | 0              | 0                    | 0                |
| nplatte.us      | 0               | 1               | 0               | 0              | 1                    | 0                |
| nyngan.au       | 0               | 1               | 0               | 0              | 1                    | 0                |
| octc.us         | 0               | 1               | 0               | 0              | 0                    | 0                |
| oklah.us        | 0               | 0               | 0               | 0              | 1                    | 0                |
| oreaa.us        | 0               | 0               | 0               | 0              | 0                    | 0                |
| oreac.us        | 0               | 0               | 0               | 0              | 0                    | 0                |
| paike.ar        | 0               | 0               | 0               | 0              | 0                    | 0                |
| passogavia.it   | 0               | 1*              | 0               | 0              | 0                    | 1                |
| pineta.es       | 0               | 0               | 0               | 0              | 0                    | 0                |
| plattev.us      | 0               | 0               | 0               | 0              | 0                    | 0                |
| pneburn.br      | 0               | 0               | 1*              | 0              | 0                    | 1                |
| pneunburn.br    | 0               | 0               | 1               | 0              | 0                    | 0                |
| pozos.ar        | 0               | 0               | 0               | 0              | 1                    | 0                |
| purdue.us       | 0               | 0               | 1               | 0              | 1                    | 0                |
| quilpie.au      | 0               | 1               | 0               | 0              | 1                    | 0                |
| rhijn.nl        | 0               | 1               | 0               | 0              | 1                    | 0                |
| riomayo.ar      | 0               | 1               | 0               | 0              | 1                    | 0                |
| sclaudio.ar     | 1               | 0               | 0               | 0              | 1                    | 0                |
| scruzh.us       | 1               | 0               | 0               | 0              | 1                    | 0                |
| scruzl.us       | 1               | 0               | 0               | 0              | 1                    | 0                |
| scruzm.us       | 1               | 0               | 0               | 0              | 1                    | 0                |
| sedgwick.us     | 0               | 1               | 0               | 0              | 1                    | 0                |
| sevblack.us     | 0               | 0               | 0               | 0              | 0                    | 0                |
| sevblue.us      | 0               | 0               | 0               | 0              | 0                    | 0                |
| sevmixed.us     | 0               | 0               | 0               | 0              | 0                    | 0                |
| sgsdrtr.us      | 0               | 0               | 0               | 0              | 0                    | 0                |
| skotsvar.no     | 0               | 1               | 1               | 0              | 1                    | 0                |
| slp.us          | 0               | 1               | 1               | 1              | 0                    | 0                |
| sonora.us       | 0               | 1               | 1               | 0              | 0                    | 0                |
| spvdrtr.ar      | 0               | 0               | 0               | 0              | 0                    | 0                |
| syferkuil.za    | 0               | 0               | 1               | 0              | 1                    | 0                |
| torla.es        | 0               | 0               | 0               | 0              | 0                    | 0                |
| ukulingadrtr.za | 0               | 0               | 0               | 1              | 1                    | 0                |
| urat.cn         | 0               | 0               | 0               | 0              | 0                    | 0                |
| validate.fr     | 0               | 0               | 0               | 1              | 1                    | 0                |
| wytham.uk       | 0               | 0               | 0               | 0              | 1                    | 0                |
| xilin.cn        | 0               | 0               | 0               | 0              | 0                    | 0                |
| yanchi.cn       | 0               | 0               | 0               | 0              | 0                    | 0                |
| yarradrtr.au    | 0               | 1               | 0               | 0              | 0                    | 0                |
| youyu.cn        | 0               | 0               | 0               | 0              | 0                    | 0                |

**Table S11.** AIC model results for comparing linear and non-linear models for drought severity, mean annual precipitation (MAP), previous year's precipitation, aridity index, and richness. Models tested included a simple linear regression (linear), asymptotic regression (asymptotic), and a generalized additive model (GAM) with the spline function set to 3. \*The asymptotic regression failed to converge for previous year's precipitation and the aridity index.

| Models compared                | df | AIC    | $\Delta$ AIC |
|--------------------------------|----|--------|--------------|
| Drought severity               |    |        |              |
| Linear                         | 3  | 138.56 | 0.00         |
| Asymptotic                     | 4  | 140.62 | 2.06         |
| GAM                            | 3  | 140.14 | 1.58         |
| MAP                            |    |        |              |
| Linear                         | 3  | 142.43 | 0.00         |
| Asymptotic                     | 4  | 143.94 | 1.51         |
| GAM                            | 3  | 145.22 | 2.79         |
| Previous Year's Precipitation* |    |        |              |
| Linear                         | 3  | 144.66 | 0.00         |
| GAM                            | 3  | 145.66 | 1            |
| Aridity Index*                 |    |        |              |
| Linear                         | 3  | 139.59 | 0.00         |
| GAM                            | 3  | 140.78 | 1.18         |
| Richness                       |    |        |              |
| Linear                         | 3  | 80.11  | 0.00         |
| Asymptotic                     | 4  | 81.55  | 1.44         |
| GAM                            | 3  | 81.13  | 1.03         |
